1 **The Homeostatic Logic of Reward**

2 Tobias Morville<sup>1</sup>, Karl Friston<sup>2</sup>, Denis Burdakov<sup>3,4</sup>, Hartwig R. Siebner<sup>1,5</sup>, Oliver J. Hulme<sup>1\*</sup>

3

4 <sup>1</sup>Danish Research Centre for Magnetic Resonance, Centre for Functional and Diagnostic

5 Imaging and Research, Copenhagen University Hospital Hvidovre, Kettegard Allé 30, 2650,

6 Hvidovre, Denmark.

7 <sup>2</sup>The Wellcome Trust Centre for Neuroimaging, University College London, 12 Queen

8 Square, London, WC1N 3BG UK.

9 <sup>3</sup>The Francis Crick Institute, Mill Hill Laboratory, London, NW7 1AA, UK.

10 <sup>4</sup>Institute of Psychiatry, Psychology and Neuroscience, Department of Developmental

11 Neurobiology, King's College London, London WC2R 2LS, UK.

12 <sup>5</sup>Department of Neurology, Copenhagen University Hospital Bispebjerg, Copenhagen, 2400,

13 Denmark

14 \*corresponding author: [oliverh@drcmr.dk](mailto:oliverh@drcmr.dk)

15

16

17 **Abstract**

18 **Energy homeostasis depends on behavior to predictively regulate metabolic states within**  
19 **narrow bounds. Here we review three theories of homeostatic control and ask how they**  
20 **provide insight into the circuitry underlying energy homeostasis. We offer two**  
21 **contributions. First, we detail how control theory and reinforcement learning are applied**  
22 **to homeostatic control. We show how these schemes rest on implausible assumptions;**  
23 **either via circular definitions, unprincipled drive functions, or by ignoring environmental**  
24 **volatility. We argue active inference can elude these shortcomings while retaining**  
25 **important features of each model. Second, we review the neural basis of energetic**  
26 **control. We focus on a subset of arcuate subpopulations that project directly to, and are**  
27 **thus in a privileged position to opponently modulate, dopaminergic cells as a function of**  
28 **energetic predictions over a spectrum of time horizons. We discuss how this can be**  
29 **interpreted under these theories, and how this can resolve paradoxes that have arisen.**  
30 **We propose this circuit constitutes a homeostatic-reward interface that underwrites the**  
31 **conjoint optimisation of physiological and behavioural homeostasis.**

32

33 **Keywords.** reward prediction error, dopamine, hypothalamus, energy homeostasis, active inference

## 34 **The problem of homeostatic control**

35 A remarkable feature of physiological systems is their stability. Most physiological  
36 variables are regulated within narrow bounds by operational and computational processes  
37 collectively known as homeostasis (Cannon 1932). The mechanistic complexity of  
38 homeostasis extends beyond simple negative feedback control and embodies a wide  
39 spectrum of hierarchically organised physiological control structures, molecule to agent,  
40 operating over a multitude of timescales, milliseconds to months (Carpenter 2004).  
41 Homeostatic control is often framed as the regulation of variables around a fixed set point,  
42 the achievement of which upholds a physiological equilibrium (Cannon 1932). Fixed set  
43 points, however useful they are as abstractions, are biologically implausible. Indeed,  
44 allostasis (under some definitions, e.g. Sterling 2012, Stephan et al. 2016) refers to the  
45 dynamic process by which homeostatic equilibria shift. For instance moving set points could  
46 occur through the transient modulations of stress, digestion, or arousal (Peters et al 2017),  
47 through to longer timescales of circadian or circannual rhythms, developmental or  
48 reproductive phases (this form of predictive regulation is also known as *rheostasis* and a  
49 great many other names, see Woods & Ramsay 2007). However, since it has been argued  
50 that predictive control does not distinguish between allostasis and homeostasis (Woods &  
51 Ramsay 2007), we use the term homeostasis in this broadest sense, to encompass  
52 predictive control. In other words, homeostasis here subsumes classical homeostatic  
53 reflexes and hierarchically embellished allostatic control. Under this nomenclature, the  
54 *raison d'être* of homeostasis is not stability per se, but rather dynamically adjusting internal  
55 states to fall within the ranges that afford organismal survival (Fig 1b; Sterling 2012).

56 For all motile agents, effective homeostatic control results from the interplay among  
57 automated physiological processes (henceforth referred to as physiological homeostasis)

58 and overt behaviour (henceforth, behavioural homeostasis). The coordinated mechanisms  
59 of physiological homeostasis are insufficient to perpetuate survival. In an indolent (inactive  
60 or sessile) organism, the incessant activity of basal metabolic processes results in the  
61 continuous drift of vital homeostatic variables, as time passes. These excursions cannot be  
62 mitigated by the coordinated mechanisms of physiological homeostasis alone. The  
63 homeostatic error, defined as the distance of the current homeostatic state (physiological  
64 state) from any set point (Fig. 1a) can only redressed by behavioural exchange with the  
65 external environment (hunting, seeking warmth, micturition etc.). Thus, homeostatic control  
66 consists of tracking, estimating, and predicting homeostatic errors, and simultaneously  
67 prioritizing and generating the appropriate physiological and behavioural responses to  
68 minimize those errors.

69 In the terms defined above, this entails a conjoint optimisation of both physiological  
70 and behavioural homeostasis. From a computational perspective, this is a challenging  
71 problem for many reasons: All natural habitats are complex, uncertain, labile, and often  
72 precarious. The resources of utility for reducing homeostatic error are typically sparsely  
73 distributed in time and space. Internal states have to be inferred accurately, or at least as  
74 accurately as their survival hazards mandate. Each internal state has its own dynamics and  
75 uncertainties, so any control mechanism has to contend with variables interacting over  
76 multiple timescales, often with different degrees of synergy, antagonism, and over different  
77 scales of lag. Thus, there are rarely simple, or even stationary, mappings between the action  
78 sequences executed and the homeostatic errors minimised.

79 In this paper, we briefly review theories and models providing an overarching  
80 framework as to how conjoint optimisation of physiological and behavioural homeostasis

81 has been approached in neuroscience. We explore how this provides insight into the logic  
82 and provenance of primary rewards with respect to homeostasis. This prefaces an empirical  
83 section, where we review the neuroanatomical basis of glycaemic and energetic control in  
84 light of recent circuit-level evidence that illustrates the predictive nature of homeostatic  
85 control circuitry, and its putative role in modulating reward value computations. We will  
86 discuss how these homeostatic networks of the midbrain and brainstem innervate  
87 dopaminergic nuclei, and modulate reward (or precision) signals, in ways that are  
88 commensurate with their homeostatic and evolutionary imperatives.

## 89 **Theoretical accounts of homeostatic control**

90 **Optimal control theory.** Some of the earliest models of homeostatic control emerged  
91 from optimal control theory. Many of these were simple negative feedback systems where  
92 direct error correction was deployed to keep vital macro-state variables close to their set-  
93 points (Sterling 2012; Berridge & Robinson 2003). Common to most reactive schemes are  
94 the notions of a controller and a plant. The controller converts an input into a command  
95 which then inputs onto the plant, which outputs a motoric response, resulting in a new  
96 input. In the context of physiological regulation (Fig. 2a) the input to the controller is a  
97 homeostatic error, which is translated into a motor command. The command results in a  
98 behavioural exchange with the environment to reduce the homeostatic error. This new  
99 physiological state serves as the next input, generating the next homeostatic error. This  
100 feedback control gives rise to iterative error correction. In the case of glycaemic control, the  
101 homeostatic error would be inferred from the difference between current states (probed  
102 through central and peripheral glucose sensors) and a euglycaemic reference state (set  
103 point). The error is translated by the controller into commands for the visceromotor plant  
104 and the somatic motor system. The former creates autonomic gluco-regulatory responses –

105 and the latter initiates a behavioural response such as foraging and consummatory action to  
106 minimize the homeostatic error. See also Powers (2016) for treatment of control theory  
107 from the perceptual side; in other words, the notion that phenomena such as homeostasis  
108 and allostasis can be cast purely in terms of keeping sensations within bounds.

109       One problem with direct feedback systems is that they are noisy and unstable  
110 (Carpenter 2004). Delays or noise in the control system can lead to error hunting, which  
111 results in oscillatory error corrections around the set-point. One solution is to introduce a  
112 predictive component (a forward model) into the control loop. In addition to an output  
113 command for the plant, direct feedback control, the controller generates an efference copy  
114 that is sent in parallel to the forward model (Fig. 2b). The forward model generates a  
115 prediction of the sensory state that is anticipated from the execution of the action, which  
116 feeds back and is compared to the set point. This culminates in a homeostatic prediction  
117 error that re-enters the controller and, if the forward model reliably predicts future  
118 homeostatic error, the controller acts accordingly to minimise this anticipated error. This  
119 logic can be expanded to include prediction error updates to the forward dynamic model  
120 (Fig. 2c).

121       Updating the forward model by discrepancies between predicted and actual  
122 interoceptive signals, is the fundamental feature of predictive processing and can (in  
123 principle) offer scope for explaining predictive homeostatic control outside the domain of  
124 purely reactive schemes. Such predictive control structures have been deployed in  
125 neuroscience to explain many phenomena, including motor control (Miall & Wolpert 1996)  
126 and awareness (Frith 2012). For comparison with the other theories we introduce below, we  
127 summarise the comparator based models of control theory in the upper part of Fig. 4.

128 Another feature that can be added to any of the models above is integral feedback  
129 control, where the time-integral of the error is controlled (Astrom 1995), rather than just  
130 the current or projected point estimate. Integral feedback control tracks a steady-state  
131 condition and only performs its regulatory action when this steady-state is violated. This  
132 form of control ensures that the system variable (e.g. glucose) returns back to the set point  
133 after a sustained step change irrespective of its magnitude. Integral feedback control  
134 account for the control of chemotaxis in bacteria (Yi et al. 2000; Barkai & Leibler 1997) and  
135 in systems neuroscience to explain flexibility of arousal and inhibitory control of the  
136 hypothalamus (Kosse & Burdakov 2014).

137 The models discussed above are deterministic in the sense that they operate under the  
138 assumption that the controller is already equipped with homeostatically rational commands  
139 to issue under the spectrum of hierarchically organised errors it can receive. In other words,  
140 such models do not by themselves offer any solution to the difficult problem of behavioural  
141 homeostasis in an uncertain and volatile environment. Answers to questions of the sort  
142 *“Which sequence of actions should I perform if I want to minimise this homeostatic error?”*  
143 are not addressed. If one is seeking to account for the conjoint optimisation of behavioural  
144 and physiological homeostasis, this is a serious limitation. Another limitation of this class of  
145 model is that it provides no principled means as to how to arbitrate between commands  
146 that entail different bundles of homeostatic error reductions; say between minimising one  
147 unit of thermal error (e.g. 1°C) and 2 units of osmolality error (e.g. 2 mOsm/kg), versus 3 and  
148 1 units, respectively. A seemingly sensible solution is to compute an aggregate homeostatic  
149 error as the Euclidean distance from set point, and choose the action that minimises that  
150 error. However, simply changing the units of measurement (e.g. from Celsius to Fahrenheit)  
151 inherently imposes an arbitrary prioritisation of one homeostatic dimension over another.

152 The aforementioned feedback control models lack any discernible principles which would  
153 allow for such prioritisation to be achieved in any biologically meaningful way.

154 **Drive reduction theory.** The problem of coordinating and prioritising multiple  
155 homeostatic feedback processes was a major inspiration to one of the earliest and most  
156 ambitious attempts at modelling behavioural homeostasis; namely, drive reduction theory  
157 (Hull 1943). Drive reduction theory was the first theory to algorithmically tether negative  
158 feedback to homeostasis via motivational drive. Instead of direct feedback via single  
159 homeostatic variables, motivational drive was proposed as a superordinate internal variable  
160 that is to be minimised over the long-run.

161 Under drive reduction theory, drive compels biological agents toward actions that  
162 remediate the basic physiological needs, in order to promote survival: “...*when any of the*  
163 *commodities or conditions necessary for individual or species survival are lacking, or when*  
164 *they deviate materially from the optimum, a state of primary need is said to exist.*” (Hull  
165 1943). Drive can thus be conceptualized as a negatively valenced state that the agent works  
166 to attenuate. In so doing, the agent attenuates the associated homeostatic deficits that  
167 cause it. Stimulus-response associations are reinforced as a function of the resulting drive  
168 reduction – a postulate refined from Thorndike (1927). The reinforcement that accumulates  
169 over time determines the strength of habitually generating a response to a given stimulus  
170 (i.e., habit strength). The probability of executing a given action (i.e., the reaction potential)  
171 is determined by both habit strength and drive. More complex formulations take into  
172 account the inhibitory effect of fatigue, but the logic is the same. Drive-reducing actions are  
173 reinforced into habits, a behavioural means by which to minimise homeostatic error.



174 While drive reduction theory provides an integrated account of how deviations from  
175 the homeostatic optimum motivates behaviour, the theory falls short of explaining  
176 anticipatory behaviour that precedes any change in motivational drive. Animals develop  
177 drive states prior to any observable homeostatic deficits such as eating when sated, drinking  
178 before blood osmolality dips, and shivering before the onset of thermal challenges (Brown  
179 1953; Sheffield & Roby 1950; Seward 1956; Bolles 1968). These early experiments show that  
180 the mechanistic account of drive reduction theory on learning is poorly predictive of  
181 behaviour, even in narrow experimental conditions.

182 **Homeostatic reinforcement learning.** Reinforcement learning, a branch of machine  
183 learning inspired in part by behavioural psychology (and optimal control theory), offers  
184 some advance on the problem of homeostatic control. In any environment endowed with  
185 temporal regularities between sensory cues, actions, and outcomes, agents maximise  
186 expected future reward through algorithms that enable anticipatory action. The overarching  
187 aim of the agent under reinforcement learning is to maximize cumulative reward over some  
188 temporal horizon (Sutton & Barto 1998).

189 This can be achieved with several algorithms, and the dominating perspective on the  
190 computational role of dopamine in behavioural motivation stems from one such algorithm;  
191 namely the temporal difference (TD) algorithm. TD-learning relies on the difference  
192 between temporally sequential estimates (or predictions) of reward. If the prediction is  
193 wrong, the difference between previously predicted return (rational expectation of  
194 discounted rewards) and the new predicted return (predicated on the outcome observed) is  
195 computed as a prediction error, which is used to update the future prediction (much like in  
196 the above description of predictive processing). This is the foundation of the reward

197 prediction error hypothesis (RPE), which states that phasic firing of dopaminergic neurons in  
198 the ventral tegmental area (VTA) and substantia nigra (SN) encode a reward prediction error  
199 signal (Montague et al. 1996). This theoretical prediction was later experimentally  
200 corroborated (Schultz et al. 1997), and since then much experimental work has underscored  
201 the importance of reward prediction errors in neurobiological accounts of learning and  
202 decision-making (Glimcher 2010; Niv et al. 2005). Several models have formulated  
203 homeostatic control using reinforcement learning algorithms (Dranius et al. 2008; Keramati  
204 & Gutkin 2014). With respect to homeostatic control, the perspective offered by  
205 Homeostatic Reinforcement Learning (HRL, Fig. 3) is interesting as it tessellates the core  
206 idea of drive reduction as sketched above, with reinforcement learning (Keramati & Gutkin  
207 2014).

208 The HRL framework defines a homeostatic state space, from which a drive function is  
209 derived, mapping non-linearly from homeostatic state to drive (Fig. 3, & 4 middle). The  
210 central logic is that with drive reductions defined as reward, agents that learn to maximise  
211 reward, will minimise drive, which minimises homeostatic error, meaning that reward  
212 maximisation and homeostatic regulation (behavioural homeostasis) are “*two sides of the*  
213 *same coin*” (Keramati & Gutkin 2014). HRL accounts for anticipatory features of behavioural  
214 homeostatic control, showing that simulated agents could learn to incur short-term  
215 homeostatic errors (e.g. deviations from a set point), in order to mitigate long-run (path  
216 integrals of) homeostatic errors. While the HRL framework accommodates anticipatory  
217 behaviour of homeostatic control, it is worth pointing out some of the residual problems.  
218 Strictly speaking, HRL theory specifies no criterion to define the biological maximandum  
219 (i.e., the optimal set point), but relies on experimenter-set value functions which have no  
220 normative grounding. Keramati and Gutkin (2014) choose their drive function as a sensible

221 and parsimonious guess based on the behavioural and economic phenomena this would  
222 entail. Interestingly they showed that several phenomena from economics and behavioural  
223 ecology could be accounted for with a simple convex drive function. To facilitate  
224 comparison between theories, HRL is juxtaposed with other models in Figure 4.

225 **Active inference.** Recent models invoke the notion of variational inference under a  
226 hierarchical Bayesian model to solve homeostatic control problems (Stephan et al. 2016;  
227 Pezzulo et al. 2015). Fundamental to those formulations is the notion that the agent deploys  
228 interoception, somatic and visceromotor actions in order to control internal states. This is  
229 framed under active inference (Fig. 4, lower), which is a corollary of the free energy  
230 principle (Friston et al. 2006; Friston 2012). Heuristically, this principle suggests that all living  
231 agents resist disorder (i.e. death) by restricting themselves to a limited number of states  
232 consistent with their physiological integrity, an idea that is consistent with homeostatic  
233 regulation as framed above, and with drive reduction theory.

234 Under active inference, agents stay alive by predicting the states that keep them alive,  
235 and act in order to fulfil those predictions. These predictions are generated in the higher  
236 levels of the neural and autonomic hierarchies and passed down to lower levels. The lower  
237 levels signal prediction errors back up the hierarchy. Prediction errors here are not about  
238 reward per se, but rather discrepancies between expected and realised sensory input.  
239 Sensory predictions are cascaded downwards in the hierarchy, and if it does not match  
240 input, prediction errors are propagated upwards in order to update the model  
241 (interoception) or act on the environment in order to change the sensory input via (motor  
242 and autonomic) reflexes (Fig. 4, lower). Importantly, agents are endowed with prior beliefs  
243 that are congruent with high-survival states, such as being sated, hydrated and warm. As

244 such, the notion of reward – common to models of reinforcement learning and optimal  
245 control – is absorbed into expectations about occupying states that increase biological  
246 fitness. Any action that underwrites the probability of fulfilling those expectations can be  
247 said to have value.

248 It is useful here to compare and contrast control theoretic formulations with active  
249 inference in the proprioceptive domain, because the same principles may apply in the  
250 interoceptive domain too. In the control of striated muscle, active inference formulations of  
251 motor control replace motor commands with predictions of proprioceptive sensations.  
252 These predictions afford the equilibrium or set points that enslave classical motor reflexes  
253 or goal-directed actions. This control architecture calls upon earlier notions such as the  
254 equilibrium point hypothesis (Feldman 1986), in which desired movements are specified in  
255 terms of equilibrium or fixed points. Clearly, as above, the question now arises: Where do  
256 the predictions or equilibria come from? In active inference, these are generated by a deep  
257 (generative) model that provides contextualised predictions that are fit for purpose, in the  
258 current context (Friston et al. 2017). In other words, hierarchically high level motor goals  
259 specify predictions of subgoals and so on – all the way down to the predicted primary  
260 sensory afferent input in the spinal cord or brain stem. The crucial aspect of this  
261 architecture is that the forward model is not used to nuance feedback control (as in  
262 comparator models of optimal control theory, e.g. Fig. 2 & Fig. 4 upper) – it plays a  
263 foundational role in prescribing behaviour as a generative model (Fig. 4, lower).  
264 Furthermore, this architecture is effectively open loop because its set points are predefined  
265 by descending predictions. However, these predictions are generated from a hierarchical  
266 synthesis that contextualises them; rendering the overall system a closed loop architecture.  
267 The argument in this paper is that exactly the same mechanisms apply in the context of

268 homoeostasis through allostatic responses that rest upon purposeful behaviour in response  
269 to the interoceptive and exteroceptive cues.

270 Ultimately, action and interoception serves to fulfil predictions of homeostatic  
271 equilibria on all levels of the hierarchy, from autonomous physiological processes to  
272 behavioural homeostasis: Autonomous processes, such as the release of insulin from the  
273 pancreas when glucose levels drop, most likely constitute the lower layers in the hierarchy  
274 of the homeostatic reflex arc and are most likely implemented by effector regions in the  
275 spinal cord and brainstem (Seth 2013; Stephan et al. 2016). Premeditated planning and  
276 decision-making that engenders allostatic change is governed by relatively higher layers in  
277 the control structure, e.g. in the prefrontal, insular, or anterior cingulate cortex (Stephan et  
278 al. 2016). Thus, the hierarchical structure of models suggested under active inference, has  
279 the potential to account for homeostatic regulation to unfold on all spatiotemporal scales  
280 relevant for physiological and behavioural homeostasis. It is the hierarchical architecture  
281 implicit in active inference that accommodates the spectrum of spatial temporal scales;  
282 providing a hierarchal distinction between high level predictions (allostasis) and low level  
283 predictions (classical homoeostasis). In this setting, low-level interoceptive prediction errors  
284 that cannot be resolved immediately are passed to higher levels to induce deliberative  
285 behaviour that, in the long-term, returns physiology to its fixed (set) points.

286 A central concept for active inference accounts of homeostatic control is the notion of  
287 information theoretical (Shannon) surprise. Technically, surprise is the negative log  
288 probability of a state – which coheres with the intuition that an internal state that is highly  
289 probable – carries less surprise than one which is improbable. Importantly the level of  
290 surprise scores how valuable states are, since the most probable states (the low surprise of

291 occupying internal states close to set point) are most probable because they afford the  
292 highest probability of survival, whereas the least probable states (the high surprise of  
293 occupying extreme internal states) are the least probable because they afford the lowest  
294 probabilities of survival. The high surprise states are thus the states in the tails of the  
295 survival probability surface in Fig. 1b. This closely relates to another concept from  
296 information theory; namely, entropy, which is simply average surprise. The overarching aim  
297 of the adaptive agent is to keep sampling sensory data that is as unsurprising as possible,  
298 because the agent expects to constantly find itself in homeostatic equilibria, minimising its  
299 entropy. This prior belief (of being close to a set point) is engendered by a generative  
300 (forward) model, yet another key concept in active inference, to which we now turn.

301 A generative model establishes a probabilistic map between hidden causes (internal or  
302 external states) to observed consequences (proprioceptive, exteroceptive or interoceptive  
303 sensory input) by combining a prior (here, encoding the prior probability of internal states)  
304 with a likelihood function (a probabilistic map from hidden internal states to observed  
305 sensory inputs, see Fig. 5). Principally, there are two means by which prediction error and  
306 thus surprise can be minimised. The agent can update its predictions to conform to the  
307 sensory input (interoception), or act on the world to change the sensory input generated by  
308 external states, to better match its predictions (action). The interested reader should see  
309 Bogacz (2015) for an tutorial based introduction to the technical aspects variational  
310 inference in context of perception.

311 When considering homeostatic control as active inference, it is important to appreciate  
312 the nature of prior beliefs. In a hierarchical setting, these are referred to as *empirical* priors.  
313 This is because they can be informed by empirical data or sensations. This leads to a picture

314 of the interoceptive hierarchy as encoding a cascade of prior expectations and subsequent  
315 predictions for the level below. In most formulations, deeper (i.e. higher) expectations  
316 usually entail longer time courses or horizons, while priors at lower levels are more  
317 concerned with proximal outcomes. On this view, surprising violations (i.e., departures from  
318 homeostatic set points) induce ascending prediction errors throughout the hierarchy until  
319 some (allostatic) expectations change the organism's circumstances. Under this framework,  
320 it is likely that some empirical priors are held with greater precision (e.g. body temperature),  
321 and thus prevail with only minor modulation over many different settings, while others will  
322 be lower in precision, and thus have greater latitude to be informed by context (e.g.  
323 hunger). We will see later, that the precisions – afforded different prediction errors at  
324 different levels of the hierarchy – are a key determinant of behaviour and the balance  
325 between allostasis and classical homeostasis.

326 In short, prior interoceptive beliefs should reflect (relatively) invariant survival  
327 probabilities, and should only be (allostatically) modulated to reflect a shift in the peak  
328 survival probabilities. A good example of this would be having a relatively invariant prior  
329 belief about what core thermal states the agent should occupy, but then modulating this  
330 under conditions of viral infection, where the survival probability function shifts such that  
331 higher thermal states have the highest survival probabilities; hence the phenomena of fever,  
332 and its related thermoregulatory behaviours.

333 Prior beliefs about homeostatic set points are likely to be hardwired in effector regions,  
334 such as the hypothalamus and brainstem nuclei. Such empirical priors are likely to be  
335 genetically specified and shaped via evolution as a function of their ability to minimise  
336 surprise, given the agents respective eco-niche (Friston & Ao 2012). On the other hand,

337 priors that pertain to learning and adaptation must be able to change during interaction with  
338 a dynamic, hierarchical and often volatile environment. For a more expansive account of  
339 learning and homeostasis under active inference see Pezzulo et al. (2015).

340 **Summary.** In the above we framed the problem of homeostasis, not as a problem of  
341 stability per se, but rather as predictive control over the physiological and behavioural  
342 processes that keep vital homeostatic variables within the narrow (but dynamic) range that  
343 ensure survival. We rehearsed some early attempts at modelling such control, using various  
344 schemes of feedback control. While these may suffice for physiological homeostasis through  
345 autonomous control (e.g. the baro-reflex or skeletal muscle control) they are often unstable,  
346 and importantly do not afford any insight into the mechanisms of behavioural homeostasis  
347 that unfold over longer timescales. Reinforcement learning solves this shortcoming by  
348 proposing several algorithms that frame adaptive behaviour as reward maximisation, which  
349 can be harnessed to defend a homeostatic set point (Draniias et al. 2008; Keramati & Gutkin  
350 2014). One exigent problem (see Friston & Ao 2012 for several others) with reinforcement  
351 learning in general is that the definition of reward is behaviour-centric: Agents strive to  
352 maximise reward, but reward is defined from observed behaviour. Or as Berridge (2004)  
353 puts it “*A circular explanation is one that attempts to explain an observation in terms of*  
354 *itself. It just reasserts what has been observed and does not really add any new*  
355 *explanation.*” Avoiding this circularity through homeostatic considerations was a central  
356 motivation for the development of Homeostatic Reinforcement Learning. Likewise active  
357 inference accounts of adaptive behaviour avoid this circularity by providing a normative  
358 account of why agents must necessarily infer and minimise surprise about their own internal  
359 hidden states in order to maintain physiological integrity (Friston 2012; Friston et al. 2006).  
360 This hierarchical Bayesian perspective absorbs the entire suite of concepts discussed above



361 (see Stephan et al. 2016 for details). Concisely, set points and error functions that are  
362 integral to any form of feedback control are replaced by prior beliefs (or predictions) about  
363 sensory input, where subsequent deviation from those beliefs is encoded as the errors of  
364 prediction (Fig. 4 lower).

365 Furthermore, the conceptual objects of reward and value that motivate behaviour (as  
366 defined in reinforcement learning), are absorbed into prior beliefs about the consequences  
367 of action (e.g. what actions minimise prediction errors), where desirable outcomes are  
368 simply those that engender the least surprising outcomes. So far, we have discussed active  
369 inference in general terms; in a way that places the predictions of hierarchal or deep  
370 generative models centre stage. To properly understand the implicit computational  
371 architecture that underwrites allostatic responses, it is worthwhile unpacking the  
372 imperatives for active inference in terms of *resolving uncertainty*. Formally, uncertainty is  
373 expected surprise. Therefore, to select policies that minimise expected surprise in the  
374 future, one has to evaluate the associated uncertainty in terms of *expected free energy*.  
375 Expected free energy usefully decomposes into epistemic and pragmatic terms – usually  
376 associated with intrinsically motivated, information-seeking, epistemic behaviour on the  
377 one hand and extrinsically motivated, reward-seeking, pragmatic behaviour on the other.  
378 The epistemic part is important for allostatic responses (and is generally ignored in  
379 reinforcement learning formulations). A simple example here is the epistemic value or  
380 affordance of checking whether the fridge contains the necessary ingredients, before  
381 starting to prepare a meal, or the foraging mammal scanning its environment to infer the  
382 location and habits of its prey. Typically, uncertainty reducing (expected free energy  
383 minimising) policies are selected that first resolve uncertainty after which, prior preferences  
384 come to dominate. This leads to a structured transition from explorative to exploitative

385 behaviour. They can also be selected under satiety states, where homeostatic errors are  
386 attenuated, and the value of exploitative action is diminished.

387 One subtle aspect of this construction is that we now need to posit generative models  
388 that entertain the future consequences of action. Although obvious, this means that there  
389 must be neuronal representations of (worldly and bodily) states in the future, under each  
390 competing policies. These counterfactual futures may have limited time horizons, but must  
391 exist under the theory. The resulting deep generative models are sometimes referred to as  
392 having *counterfactual depth* that necessarily entails a future. The notion of counterfactual  
393 encoding (i.e., neuronal representations of future states) is therefore something that should  
394 figure, when trying to understand interoception and its role in homeostasis (Seth 2014).

395 Crucial for our argument is that policy selection depends upon the degree to which a  
396 given policy will resolve uncertainty and the confidence or precision placed in the ensuing  
397 beliefs about policies. In other words, to select the best policy, one has to evaluate the  
398 precision or confidence in beliefs about alternative ways forward. A body of evidence now  
399 points to dopamine as signalling fluctuations in the precision or confidence associated with  
400 policy selection (Fiorillo, Tobler et al. 2003, Niv, Duff et al. 2005, Humphries, Khamassi et al.  
401 2012, Friston, Schwartenbeck et al. 2014, Schwartenbeck, FitzGerald et al. 2015). This will  
402 become relevant later when we interrogate the empirical evidence that speaks to different  
403 theoretical formulations of homeostatic control.

404

## 405 **Neural bases of energetic control**

406 In the following empirical section, we survey recent evidence that suggests that  
407 particular circuits of the hypothalamus and brainstem play a role in predictive homeostatic  
408 control. We will focus exclusively on energetic control, as the experimental evidence for this  
409 homeostatic dimension is extensive and (at least relative to other homeostatic dimensions)  
410 easy to manipulate and measure. This subfield also contextualises the common use of  
411 hunger as the predominant motivational strategy for animal experiments.

412 **Hypothalamus as a homeostatic controller.** Situated inferior to the thalamus and  
413 superior to the pituitary gland, the hypothalamus is an archipelago of distinct nuclei,  
414 charged with coordinating a microcosm of homeostatic functions (Fig. 6a). The existence of  
415 opponent energy-regulating processes was an early and exciting discovery; two  
416 hypothalamic regions with opposing effects on food intake were found, a lateral area  
417 resulting in hyperphagia when stimulated ('feeding centre'), and a ventromedial area  
418 resulting in hyperphagia when ablated ('satiety centre', Aand & Brobeck 1951; Brobeck  
419 1946). Since then, modern cell-type specific techniques for circuit manipulation and  
420 projection-specific has afforded an unprecedented window into the deep and  
421 neuroanatomically complex networks involved in energy homeostasis. One of the major  
422 components of these networks is the arcuate nucleus (ARC), lying in the mediobasal  
423 hypothalamus, on either side of the third ventricle, just above the median eminence. There  
424 also, at a finer sub-nuclei scale, opponency remains an important principle. Two cell types  
425 are found to be crucial for the control of feeding (Atasoy et al. 2012), identified by  
426 expression of the neuropeptides Agouti-related Protein (AgRP) and Proopiomelanocortin  
427 (POMC), which have seemingly opposing properties.

428 AgRP neurons are activated by energy deficits (Mandelblat-Cerf et al. 2015), report on  
429 the nutritional state of the body, and are both necessary (Luquet et al. 2005) and sufficient  
430 (Aponte et al. 2011) to evoke voracious feeding and food-seeking behaviours: the number of  
431 stimulated AgRP neurons is linearly predictive of food intake. These effects appear to be  
432 mediated by GABA and the neuropeptides NPY and AgRP, that stimulate food intake when  
433 delivered directly to the arcuate nucleus. In the absence of food, stimulation of AgRP  
434 neurons promote a range of learned behaviours that relate to hunger and food-seeking  
435 (Dietrich et al. 2015). POMC neurons by contrast are activated by energy surfeit and their  
436 activity inhibits food intake and promotes weight loss (Atasoy et al. 2012). AgRP and POMC  
437 neurons are both regulated by the circulating endocrine signals of nutritional state,  
438 modulating their activity in mutually opposing directions consistent with their function.  
439 These two cell types interact in part through a common set of downstream melanocortin  
440 expressing neurons that are activated by POMC and inhibited by AgRP. These two  
441 subpopulations are interspersed within the ARC making it an obvious candidate site for the  
442 encoding prediction errors for energetic wealth (energy balance, or other synonyms).

443 **Predictive responding.** A recent stream of research has employed cell-specific  
444 techniques to image and causally manipulate the activity of AgRP neurons under different  
445 homeostatic challenges that each manipulate homeostatic error, and thus causally control  
446 the motivational state of the animal. Natural deprivation, ghrelin injection, pharmacological  
447 or optogenetic activation of AgRP neurons evoke voracious feeding and inhibit POMC  
448 neurons, as might be expected with a large deviation from a set point (Betley et al. 2015;  
449 Chen et al. 2016; Krashes et al. 2014; Mandelblat-Cerf et al. 2015). However, a homeostatic-  
450 comparator based view of the hypothalamus has been challenged by several recent papers

451 that show AgRP and POMC neurons encode predictive signals, varying as a function of  
452 future expectations, rather than currently realised energy states per se.

453 **The sensory paradox.** These aforementioned papers show for example that fasting-  
454 activated AgRP cells are inhibited by the visual presentation of food, prior to eating. This  
455 phenomena appears to be paradoxical (the sensory paradox, hence) for the homeostatic  
456 view of AgRP encoding drive (Wise 2013). If AgRP neurons encode feeding or drive (hunger)  
457 how can they switch off prior to feeding, given that drive is not immediately mitigated upon  
458 seeing the food? Emphasis on the surprising nature of this result, now replicated several  
459 times, hinged on the fact that inhibition occurs even before the food is tasted. Yet, we  
460 would argue that the predictive nature of the signal, does not rest on it occurring before the  
461 taste of the food, since even if it were time-locked to the taste at consumption, it would still  
462 be predictive insofar as no change in nutritive wealth is yet manifest. Indeed, any candidate  
463 drive or hunger signal that changes reliably to extero- or interoceptive cues is still a  
464 predictive signal with respect to the slow dynamics of the gastro-intestinal cascade (the  
465 cascade of physiological events that happen after ingestion). Arguably the energy content of  
466 a food is not fully appropriated until the post-absorptive phase. In this light, the sensory  
467 paradox is just as much a paradox for interoceptive responses time-locked to consumption  
468 (like taste or olfaction), as they are to the exteroceptive signals underpinning cue-learning  
469 (e.g. sight). Since these responses are not taken to be paradoxical, it could be said that the  
470 sensory paradox somewhat dissolves.

471 In all reported cases to date, most of the above-baseline activity of AgRP neurons was  
472 inhibited prior to feeding initiation (Chen et al. 2016; Betley et al. 2015; Mandelblat-Cerf et  
473 al. 2015; Chen & Knight 2015). The degree of inhibition has been shown to depend on food

474 quality, caloric content (Chen et al. 2016), and even show a rebound back to original levels  
475 upon the experimenter rescinding food. These up and down modulations of AgRP that vary  
476 as a function of the agents beliefs, are mirrored by the hormonal signals of energetic status,  
477 that can also be considered endocrine predictors of future energetic wealth: Leptin,  
478 putatively signalling positive energetic wealth (Domingos et al. 2011), suppresses AgRP  
479 (Takahashi & R. D. Cone 2005; Fulton 2000; Betley et al. 2015); whereas ghrelin, putatively  
480 signalling its converse, excites. The inhibition appears sensitive to the appetitive affordance  
481 of food (Gibson 2001), such that food presentation in a closed container that allowed sight  
482 and smell of food but not consumption, had diminished inhibitory effects (Chen et al. 2016).

483       Indeed, compatible with the fact that feeding can always be disturbed at any point,  
484 residual AgRP firing persists throughout the consummatory period (Mandelblat-Cerf et al.  
485 2015). Through the lens of drive reduction theory, AgRP inhibition thus appears to track the  
486 expected drive that fluctuates with incoming sensory evidence (and thus how this updates  
487 the brain's generative model). These findings are all compatible on the interpretation that  
488 AgRP firing itself encodes counterfactual prediction errors over a spectrum of near-term  
489 temporal horizons. On this hypothesis, AgRP should be inhibited by any exteroceptive or  
490 interoceptive cue that predicts reductions in energetic drive, and excited by any such  
491 sensory cues that predict inflations of energetic drive. This expectation would plausibly be  
492 predicated on an accumulation of evidence integrating sensory modalities. One obvious  
493 prediction would be that the AgRP baseline firing effect should, with sufficient training, be  
494 quantitatively sensitive to the predictive probability of sensory cues in both directions,  
495 signalling expected decrements and increments in expected energetic prediction errors. It  
496 should be noted that these expected future energetic prediction errors are prediction errors  
497 over viscerosensory states associated with energetic wealth, that likely follow from

498 gastrointestinal and adipose systems. The way that energetic wealth predictions are derived  
499 from these redundant signals will be an important next step toward understanding the AgRP  
500 encoding function.

501 It is interesting to note that the AgRP responses are heterogeneous in their temporal  
502 kinetics (Betley et al. 2015), in responding to food-predictive cues, with some showing a  
503 slow attenuation over time, and others faster. This suggests that the AgRP population as a  
504 whole encodes a distribution of energetic errors over a spectrum of temporal horizons.

505 **Valence signalling.** Another interesting parallel, between this new wave of AgRP data  
506 and drive reduction theory as outlined above, is that both drive and AgRP carry negative  
507 valence, as well as the fact that reducing-drive and reducing-AgRP activity are imbued with  
508 positive valence. This is a subtle issue, and can cause some seemingly conflicting  
509 conclusions, with some groups reporting that AgRP carries negative valence (Betley et al.  
510 2015), and others reporting its positive valence (Chen et al. 2016). The discrepancy can  
511 arguably be resolved in light of DR. Under DR (and therefore its cognate, HRL), drive is a  
512 negative valence signal, that agents work to minimise. Actions that reduce drive are  
513 rewarding which reveals why the attribution of valence to neural signals could easily be  
514 conflated. The key prediction is that if AgRP signals future drive (an error on the predicted  
515 energetic wealth), then AgRP stimulation, in the absence of any means of reducing drive (i.e.  
516 food), should be aversive since drive-inflations are costs (negative reward). Indeed, AgRP  
517 stimulation can condition place (and flavour) aversion (Betley et al. 2015). However in the  
518 presence of food, the drive reduction that follows AgRP stimulation should be larger and  
519 thus more rewarding, thus the reinforcing effect of AgRP stimulation should only occur in  
520 the presence of food, which is indeed what is observed (Chen et al. 2016). This is indeed a

521 key distinction between the two opposing papers. One apparent problem with this model, is  
522 that mice fail to perform operant responses in order to shut off AgRP neuron activity (Betley  
523 et al. 2015; Chen et al. 2016); however, it is important to consider issues of credit  
524 assignment. Under natural conditions, a drive reduction such as that associated with AgRP  
525 silencing, in the absence of sensory food cues, can only be due to post-ingestive effects. This  
526 means that the food consumed minutes or hours previously will be assigned the credit for  
527 the drive-reduction caused by AgRP inhibition now, which predicts that recently performed  
528 operant actions should not necessarily be reinforced at all. Under the mouse's generative  
529 model of the world, (again in the absence of sensory food cues) the drive reduction should  
530 most likely be caused by actions/sensory/gustatory events long before the operant action  
531 was performed. How easily mice could learn this long-range temporal contingency with  
532 overtraining though is an open question.

### 533 **Interface between reward prediction errors and glycaemic control**

534 **Introducing dopamine.** The catecholamine dopamine is synonymous with  
535 reinforcement, reward and motivation. Whilst the literature on dopamine is vast, we will  
536 restrict discussion to its putative role in glycaemic or energetic control as discussed above. It  
537 is well known that phasic signals in ventral tegmental area (VTA-DA), and thus dopamine  
538 release in the mesolimbic system, systematically scale with the nutritive value of oro-  
539 sensory events in monkeys, where reward magnitude is determined by the volume of  
540 nutrients consumed (Tobler et al. 2005; Stauffer et al. 2014; Ballard & Knutson 2009). In  
541 humans, there is evidence that post-prandial dopamine release is modulated by deprivation  
542 with dopamine binding decreasing more in response to consumption after fasting compared  
543 to non-fasting (Small et al. 2003). This echoes extant evidence from rats and mice that show  
544 increased dopaminergic release (as measured by dopamine metabolite 3,4-



545 dihydroxyphenylacetic acid) at feeding after a period of starvation in the nucleus accumbens  
546 (NAc, McCullough & Salamone 1992; Radhakishun et al. 1988), medial prefrontal cortex (but  
547 not NAc, Carlson et al. 1987) and interestingly, the posterior hypothalamus (Heffner et al.  
548 1980). Despite these findings and others, one of the curious features of the literature on  
549 phasic DA and reward is that animals are motivated by a homeostatic deficit such as thirst or  
550 hunger, and yet homeostatic states are rarely foregrounded in analyses of relevant  
551 modulators of reward signalling. One recent interesting exception to this is offered by Cone  
552 and colleagues, who present evidence for how sodium depletion can modulate RPE in the  
553 NAc of rats (J. J. Cone et al. 2016). By pairing sodium sated and depleted rats with  
554 conditioned and unconditioned stimuli, they found that phasic dopaminergic RPE signals can  
555 manifest independently of learning and are “*expressed as a function of their current*  
556 [*homeostatic*] *value to the organism*” (J. J. Cone et al. 2016, square brackets added).

557 Thus, on many grounds, homeostatic states should be potent modulators of these DA  
558 signals. As the animal plays its task for consumption of water or sugar-containing juice, its  
559 homeostatic deficits diminish, or are predicted to diminish, meaning that the value of those  
560 commodities should steadily decrease. Indeed, given the quantitative evidence for a relation  
561 between RPE and marginal utility (Stauffer et al. 2014), the fact that this is rarely tested or  
562 acknowledged (or for that matter controlled for) is surprising, given that the manipulation  
563 that makes the outcomes rewarding is continually being attenuated, until the animal rejects  
564 further play, presumably because the marginal utility of consumption has depleted to a  
565 point of indifference. For this reason, we recommend greater scrutiny of homeostatic  
566 states, and their dynamics under neurobiological studies of reward. In the case of energetic  
567 variables, intra-arterial telemetric glucose monitors are now available, and could afford  
568 important insights in this regard.

569           At this point, we introduce a fundamentally different perspective on the role of  
570 dopamine. In schemes that commit themselves to some form of reinforcement learning,  
571 dopamine is usually cast as a reward prediction error (Fig. 4, middle); namely, the difference  
572 between expected and encountered reward. This is in contrast to active inference  
573 formulations, which accommodates the fact that dopamine is a neuromodulator. In other  
574 words, dopamine cannot drive synaptic responses – it can only modulate them. This  
575 modulatory role is exactly that required of precision. On this view, phasic dopamine  
576 responses signal an increase in the precision or confidence placed in beliefs about ongoing  
577 policies. For example, the transfer of dopamine responses from unconditioned to  
578 conditioned stimuli reflect the increase in confidence about “*what I should do*” after  
579 observing a conditioned stimulus. In short, the reinforcement learning (reward learning)  
580 story associates dopaminergic responses with RPE, while the active inference story treats  
581 dopaminergic function as encoding the confidence in policy selection, based upon inferred  
582 states of the world.

583           **Homeostatic reinforcement interface.** Despite the paucity of direct evidence for the  
584 interface between homeostatic variables and reward or precision computations, there is  
585 convergent (but still tentative) evidence to suggest how the interface could be implemented  
586 (Fig. 6a & 6b). VTA-DA neurons host a number of receptors that would mediate this  
587 interface; they are positively modulated by ghrelin, a hormone reporting short-term energy  
588 deficits, and melanocyte-stimulating hormones ( $\alpha, \beta, \gamma$ ) released from POMC neurons;  
589 whereas they are inhibited by AgRP and its co-transmitter GABA, as well as by hormone  
590 insulin, and leptin, as well as by GLP-1 (Ferrario et al. 2016). Thus, the cells themselves  
591 provide ample opportunity for interfacing from homeostatic state information to the  
592 precision or reward value signal that is broadcast to the mesolimbic system from the VTA.

593 Thus, the first question to ask is do they connect directly? Yes. AgRP axons project  
594 directly to both the VTA and the substantia nigra (Dietrich et al. 2012), and POMC neurons  
595 have been labelled by retrograde tracers in the VTA (King & Hentges 2011, Fig. 7). On the  
596 reinforcement learning account AgRP, neurons should positively modulate VTA-DA, since  
597 they encode something hunger-like and hunger increases the value of food. Conversely,  
598 POMC neurons, encoding the converse of AgRP, should then negatively modulate VTA-DA.

599 In fact, the opposite appears to be observed. As noted above, AgRP neurons exert  
600 inhibitory effects over VTA-DA cells, directly via inverse agonism of the MCR3 receptor (the  
601 predominant melanocortin receptor expressed on VTA-DA neurons), and indirectly via its  
602 co-transmitter GABA, that acts to stimulate inhibitory interneurons that inhibit VTA-DA cells.  
603 Symmetrically, POMC neurons release melanocyte-stimulating hormones which also  
604 activate MCR3, which activates the VTA-DA neurons. These empirical results fit comfortably  
605 with active inference in the following sense: If AgRP neurons encode the hypothesis that "*I*  
606 *need to eat*", then higher level (allostatic) expectations about eating will suppress their  
607 activity. However, the higher-level expectations that "*I am about to eat*" must be held with  
608 confidence or precision that is accompanied by dopaminergic discharges. In short, when  
609 AgRP firing is suppressed this will necessarily entail a confidence belief that "*I am about to*  
610 *eat*" and a disinhibition of dopaminergic outflow to the cortical basal ganglia thalamic  
611 systems responsible for policy selection.

612 **Why the counterintuitive responding?** Taken in the context of the predictive control  
613 findings discussed above if AgRP is deactivated, this means that under our interpretation,  
614 the precision on the prediction of positive future energy wealth increases, which is encoded  
615 via phasic dopamine, via the release of VTA-DA from inhibition. Likewise, if the POMC

616 neurons are simultaneously activated by the same sensory evidence, then this has an  
617 excitatory effect on the same VTA-DA cells, which together with the AgRP disinhibition,  
618 provides a means by which VTA-DA signalling can be anchored to updates of predictions on  
619 future energetic wealth (i.e., the consequences of beliefs about the current long-term policy  
620 are assigned high precision or confidence). This is corroborated by ex-vivo recordings in  
621 which VTA-DA neurons increase baseline firing to injections of  $\gamma$ -MSH (Pandit et al. 2015). It  
622 should be noted that these findings seem to be at odds with the existing consensus that  
623 AgRP neurons acts to increase feeding and reward, and MSH acts to decrease feeding (Yen  
624 & Roseberry 2015).

625 This might however be an artefact of the way these injection experiments are  
626 performed. Pandit and colleagues (2015) show that infusion of a non-specific MCR agonist  
627 that targets both MC3R and MC4R, then sucrose responding decreases (also shown by  
628 Shanmugarajah et al. 2017; Yen & Roseberry 2015). However, by adding an MC4R  
629 antagonist, turns this response into an increase in sucrose responding. The important point  
630 here being that MC3R is predominantly expressed in the VTA, whereas the MC4R is  
631 expressed more broadly (for instance in the Nucleus accumbens) but not in the VTA.  
632 Interestingly the MC3R are predominantly expressed on the D2R expressing neurons that  
633 project into the nucleus accumbens. Notably the increased sucrose responding mediated by  
634 MC3R receptor agonism, is dependent on dopamine since DA-antagonism eliminates the  
635 effect (Pandit et al. 2015). Together, this might explain the apparent contradictions between  
636 prior work showing that melanocortin injections decrease responses to food reward (Yen &  
637 Roseberry 2015).

638

## 639 **Conclusion**

640 In addressing the problems of homeostatic control, we have tried to bridge between  
641 several different fields, from evolutionary theory, neo-behaviourism, reinforcement  
642 learning, and computational and metabolic neurosciences. In doing so, this paper offers two  
643 main contributions.

644 First, we revisited how control theory and reinforcement learning have been applied to  
645 motivational behaviour, reward and homeostasis. We marshalled existing as well as novel  
646 arguments, for how these schemes rest on biologically implausible assumptions, either via  
647 circular definitions of reward, unprincipled groundings of value or drive functions, or by  
648 assuming degrees of certainty that are incompatible with the capricious nature of our  
649 natural habitats. Against this background, we have reviewed the active inference framework  
650 as it applies to these same homeostatic control problems. Putatively, we conclude that this  
651 offers promise in circumventing the shortcomings summarised above, and at the same time  
652 retains and builds on several important notions from comparator-based and reinforcement  
653 learning models. Of these conceptual advances, the most important are that set points are  
654 absorbed into prior beliefs about hidden viscerosensory states, that homeostatic errors are  
655 cast as precision-weighted errors on interoceptive predictions, and that optimal choice  
656 behaviour is framed as an inferential process given a generative model of the body and its  
657 environment.

658 Second, we reviewed extant evidence pertaining to the how homeostasis interfaces  
659 with value computations in the domain of nutrient energy. Focusing on the case of the  
660 arcuate nucleus, we reviewed recent evidence for its role in the predictive control of energy  
661 homeostasis, contextualising the observations in the context of competing theoretical

662 formulations. We assembled evidence suggesting that a subset of these arcuate  
663 subpopulations project directly to, and are thus in a privileged position to opponently  
664 modulate, dopaminergic VTA cells as a function of energetic predictions over a spectrum of  
665 temporal horizons. Further, we have surveyed how circulating factors that contribute to the  
666 dynamics of glucose homeostasis are direct modulators of dopaminergic neurons in the  
667 midbrain as well. The emerging picture points to a multi-faceted homeostatic-reward  
668 interface between the hypothalamus and midbrain. This interface may play a pivotal role in  
669 the conjoint optimisation of physiological and behavioural homeostasis.

670 That said – given the current state of knowledge – assigning computational roles to  
671 hypothalamic neurons may be premature. The computational quantities entailed by active  
672 inference are many, and their differences can be subtle. For instance, whether AgRP or  
673 POMC are encoding predictions, prediction errors, interoceptive states, or precisions  
674 portended by those states, will require careful experimentation. Existing evidence does not  
675 yet conclusively support one or the other. However, we hope that the theoretical  
676 perspective offered here motivates empirical experiments that can disambiguate between  
677 computational formulations of the brain’s homeostatic-reinforcement interface.

678

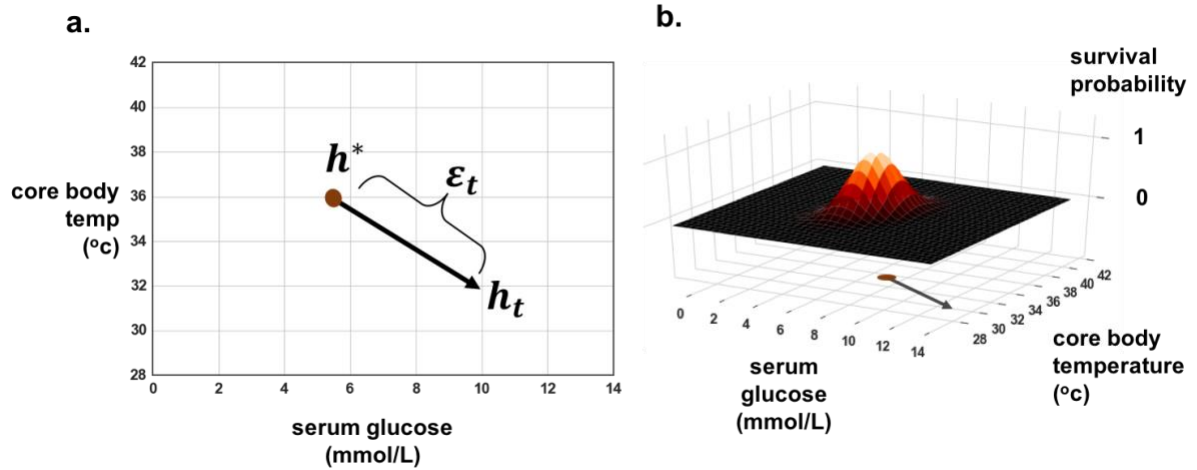

679

680 **Figure 1 | Homeostatic state space and survival probability.** a, Schematic showing a simple 2-dimensional  
681 homeostatic state space, where  $h^*$  denotes a set point,  $h_t$  current state at time  $t$ , and the error between them  
682 defined here as the absolute Euclidean distance  $\epsilon_t$ . b, Shows a survival probability surface, depicted over the  
683 same homeostatic state space, thus highlighting the relation between homeostatic error and the conditional  
684 probability of survival (over some time interval), given the occupation of that homeostatic state.

685

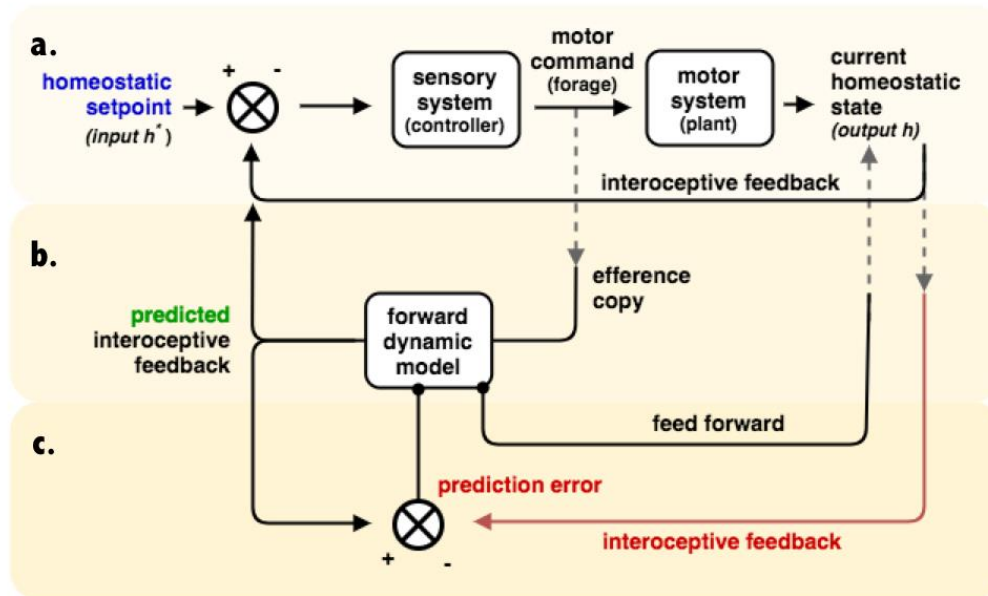

686

687

688

689

690

691

692

693

694

695

696

697

698

699

700

**Figure 2 | Comparator-based models.** Under this class of model, the agent is described as a homeostatic error-correcting system. Broadly, the brain receives viscerosensory input from the body given its current physiological state, and it computes the homeostatic error between its current state and its set point ( $h^*$ ), and then iteratively deploys controlled action to correct this. **a**, Depicts the subsystem that entails direct feedback control, which combines a controller (here the sensory system), with a plant (here the motor system) that executes action to influence the current homeostatic state. The current homeostatic state is sensed by interoceptive feedback, which when compared to homeostatic set point, results in a homeostatic error that is forwarded to the controller, from which further motor commands are sent to the plant to iteratively minimise error. This is the homeostatic mechanism described by most physiology textbooks. **b**, An efference copy of the motor command is sent to a forward dynamic model that predicts the future interoceptive feedback, given the motor command. Residual errors between the predicted state and the set point are then iteratively minimised with further commands. **c**, Finally, a prediction error, computed as the error between the predicted and the current state is used to update the forward dynamic model. Insofar the system minimises this prediction error, the forward dynamic model makes accurate predictions of the homeostatic consequences of its actions.



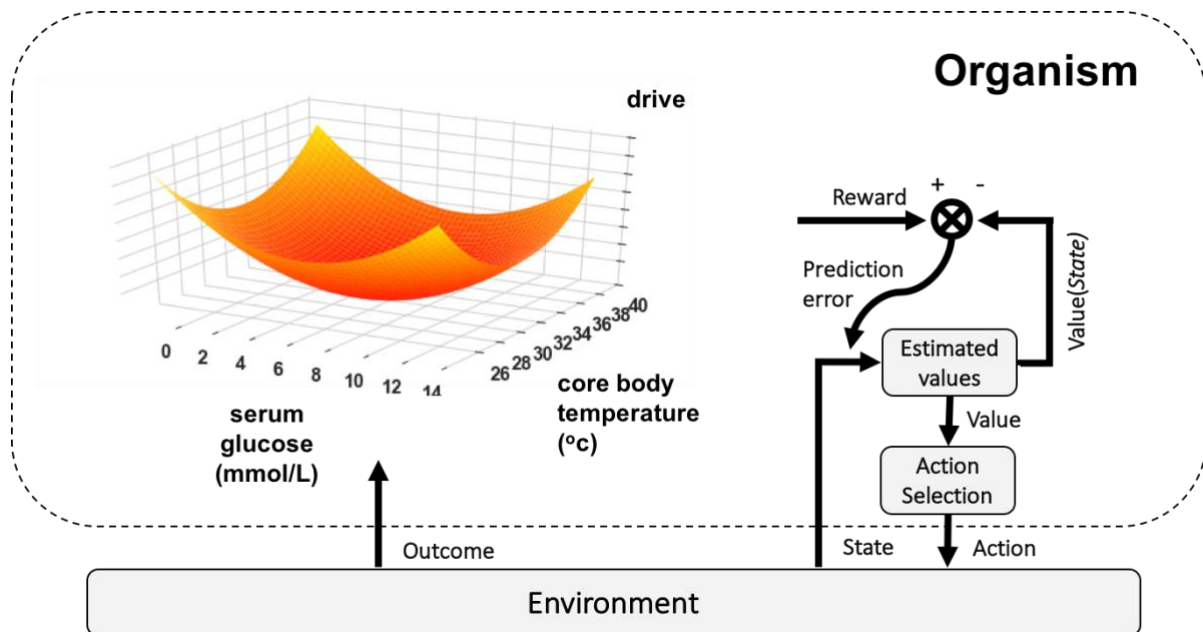

701  
702  
703  
704  
705  
706  
707  
708  
709  
710  
711  
712  
713

**Figure 3 | Homeostatic reinforcement learning.** In the upper left, the surface represents a drive function, mapping from homeostatic state space (horizontal plane) to drive (vertical axis). The drive function depends on the homeostatic state space, and the system to be modelled. Here, we illustrate a drive function based on the surprise (negative log probability) derived from the survival probability function illustrated in Fig. 1b. If the drive function is appropriately configured, then actions – that influence homeostatic state such that homeostatic error is reduced – result in drive reduction. Under HRL, drive reduction is defined as rewarding, as in drive reduction theory. By comparing the estimated value to the actual reward experienced (with negative reward as drive inflation), a reward prediction error is generated and used to update future estimates of value. Actions are selected as a function of these estimated values, such that selecting the actions that maximise value, result in environmental exchanges that minimise drive, maximise reward, and thus minimise homeostatic error. Adapted from (Keramati & Gutkin 2014) with permission.

### Optimal Control Theory

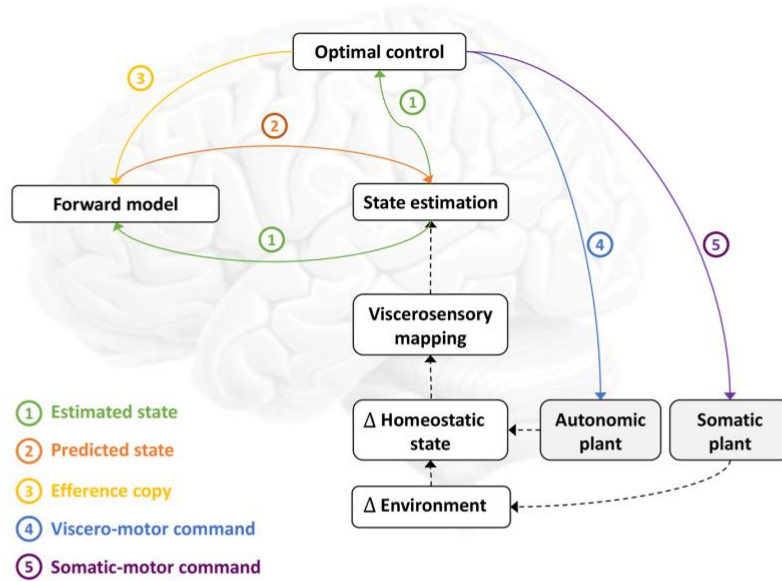

### Homeostatic Reinforcement Learning

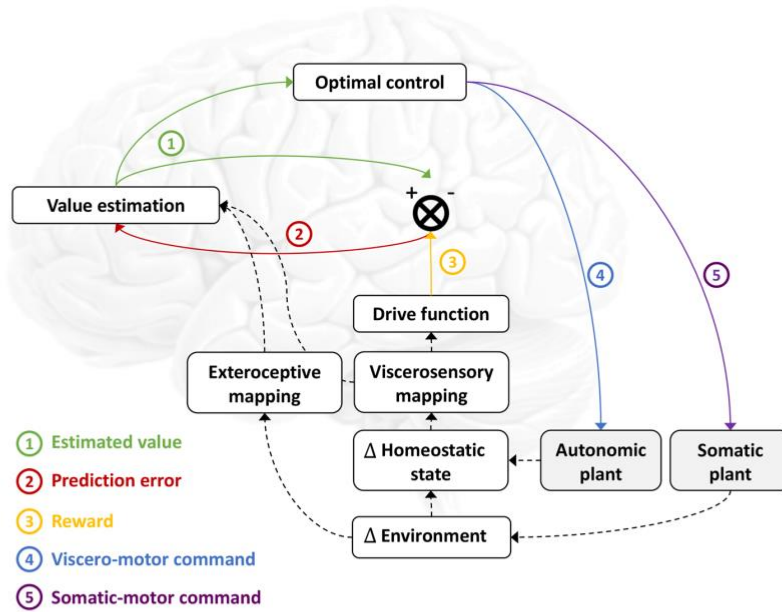

### Active Inference

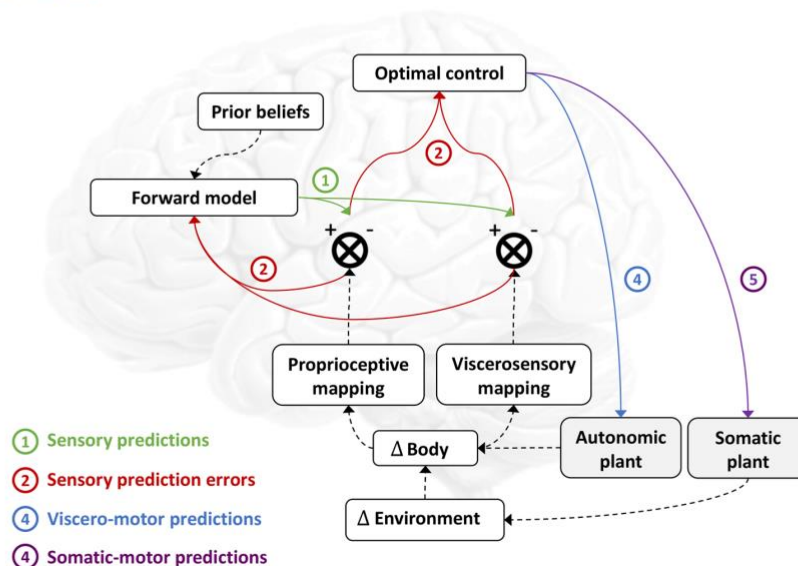

715 **Figure 4 | Comparing models.** Common to all model architectures is the fact that the agent is in a given  
716 homeostatic state and a given environmental state. The agent can act in two ways. First it can engage in  
717 physiological homeostasis by controlling its autonomic plant, which directly modulates the homeostatic state  
718 of the body ( $\Delta$ homeostatic state). Second it can engage in behavioural homeostasis by moving, via the  
719 somatic-motor system, to change its sampling of the environment ( $\Delta$ environment), which will indirectly  
720 change its homeostatic state. These changes in homeostatic state are hidden, but they can be transformed  
721 into neural input by the viscerosensory system (viscerosensory mapping). How the different theories prescribe  
722 the control of these two plants based on sensory inputs is highlighted in the following comparison. **Optimal**  
723 **control theory.** This is a schematic summary of the components commonly found in conventional treatments  
724 of optimal motor control, here applied to homeostatic control. The hidden homeostatic states produce  
725 interoceptive sensations through the viscerosensory mapping. This viscerosensory input is used for hidden-  
726 state estimation (e.g. by Bayesian filtering) based on the forward model and a (weighted) prediction error. The  
727 prediction error is the difference between sensory input and predictions of that input given the predicted state  
728 (orange). The state estimates are used for optimal control, which returns motor commands (purple and blue)  
729 that minimize future cost or loss, specified by a cost function (not shown, alternatively known as an inverse  
730 model). These optimal control signals are then sent to the two motor plants and (through an efference copy,  
731 yellow) to the forward model. The forward model then computes the predicted change in hidden homeostatic  
732 states. In this scheme, the forward model can be regarded as a mapping from motor control to changes in  
733 hidden homeostatic states. Effectively, its role is to finesse the problem of inferring homeostatic states and  
734 thereby optimize homeostatic control signals. This is necessary because delays and noise on sensory signals  
735 could easily confound the implicit closed-loop control used by this scheme. **Homeostatic reinforcement**  
736 **learning.** Here we interpret the schematic in Fig. 3 using the same logic and terms wherever possible. Again,  
737 we start with the hidden homeostatic states that are sensed via a viscerosensory mapping. This viscerosensory  
738 input is submitted to a drive function, mapping from sensory state to the negative valenced motivational drive.  
739 The drive reductions are encoded as experienced rewards (maroon), which are subject to a temporal  
740 difference learning, where the value of sensory states are estimated as the rational expectations of future  
741 discounted rewards following from that state. The difference between the value estimated at a given trial  
742 (green), and the updates to that value based on the new sensory inputs (exteroceptive and viscerosensory),  
743 yields a reward prediction error (red), that is used to update the value estimate. The value estimates (green)  
744 for different possible actions, are then subject to action selection, from which the highest value action can be  
745 probabilistically selected. **Active inference.** We start again by considering environmental dynamics caused by  
746 somatic action. Along with autonomic action, this can result in changes to the body, causing both  
747 proprioceptive and viscerosensory input (we omit exteroceptive sensations for clarity), yielding proprioceptive  
748 and viscerosensory prediction errors. These prediction errors are simply the difference between the sensory  
749 input observed and the sensory inputs predicted under the predicted (hidden) states. In this form, top-down  
750 predictions from the forward model are compared with sensory inputs to produce bottom-up prediction errors  
751 (red connections) that enter the forward model. Crucially, the mapping from hidden states to sensations is  
752 now part of the forward (and thus, generative) model. Here, cost functions have been replaced by prior beliefs

753 about (desired) homeostatic states. Allostatic regulation here can be achieved through prior beliefs over  
754 homeostatic trajectories. These prior beliefs enter the forward model to guide predictions of sensory inputs.  
755 These prior beliefs set the targets and priorities of homeostatic control, and thus are strongly selected as a  
756 function of their contribution to survival (and thus fitness). Proprioceptive predictions are fulfilled by the  
757 somatic motor system by classical motor reflex arcs (the somatic plant), while predictions of viscerosensory  
758 input are fulfilled by the autonomic plant. Optimal control now reduces to simply suppressing proprioceptive  
759 and viscerosensory prediction errors.

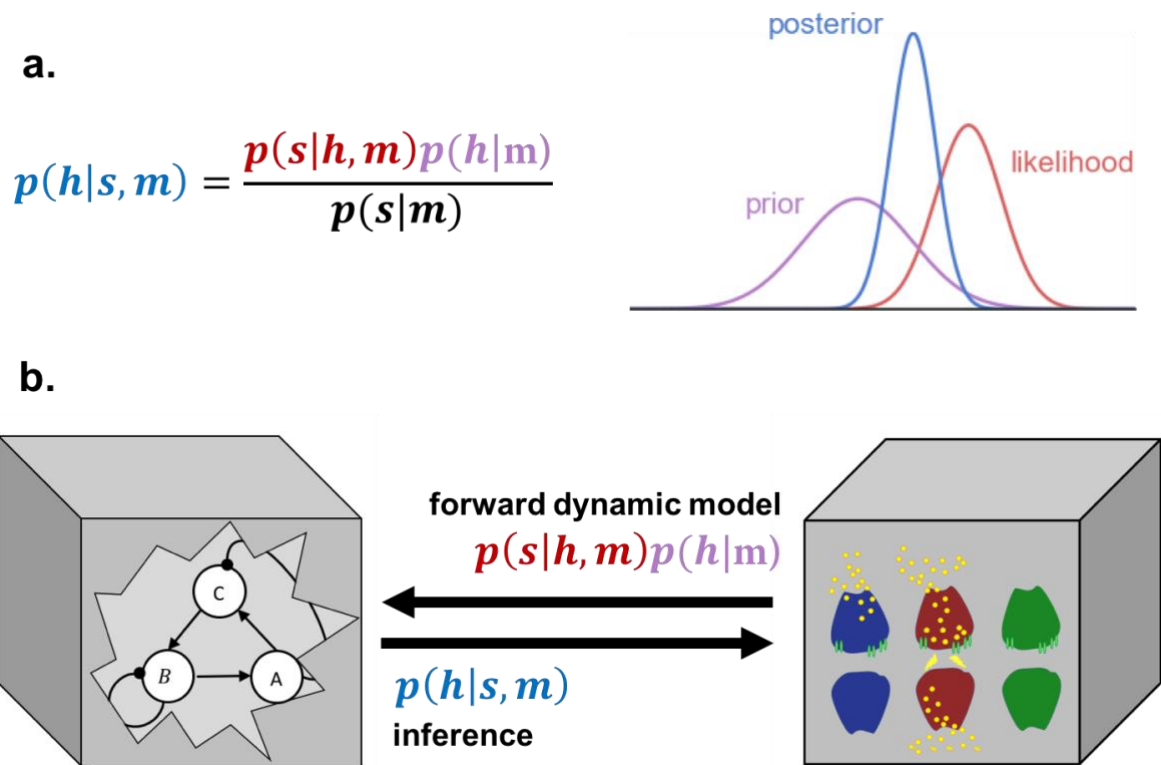

760

761 **Figure 5 | Interception, Bayes rule and generative models.** **a.** Bayes rule provides the probabilistic  
 762 foundation for the generative model  $m$ , which the agent embodies, and under which the agent expects  
 763 homeostasis. This consists of a likelihood function  $p(s|h, m)$  (a probabilistic map from hidden external states,  
 764  $h$ , to sensory inputs  $s$ ) in conjunction with a prior ( $h|m$ ) (a probability distribution over external states,  
 765 including bodily states). In this setting, the prior can be interpreted as a probabilistic set point. Calculating the  
 766 posterior  $p(h|s, m)$  is model inversion and yields the probability of a hidden homeostatic state, given the  
 767 sensory input. Thus, the posterior is a mix between likelihood (how likely is this) and prior (how often does it  
 768 occur) weighted by their relative precision (see Bogacz 2015). The denominator  $p(s|m)$  is a normalisation term  
 769 that ensures the posterior integrates to one. Importantly, this term is also the foundation of Bayesian model  
 770 selection (see Ghahramani 2012 for an introduction). **b.** Illustrates how homeostatic dynamics (left box) that  
 771 are hidden from the agent give rise to sensory input  $s$ , which the phenotype must infer on, given its generative  
 772 model  $m$ . The causal structure of the external world (including the body) is encoded in synaptic activity (right  
 773 box) encoded in a forward dynamic model, which allows inference about the causes (hidden states) of the  
 774 sensory input.

775

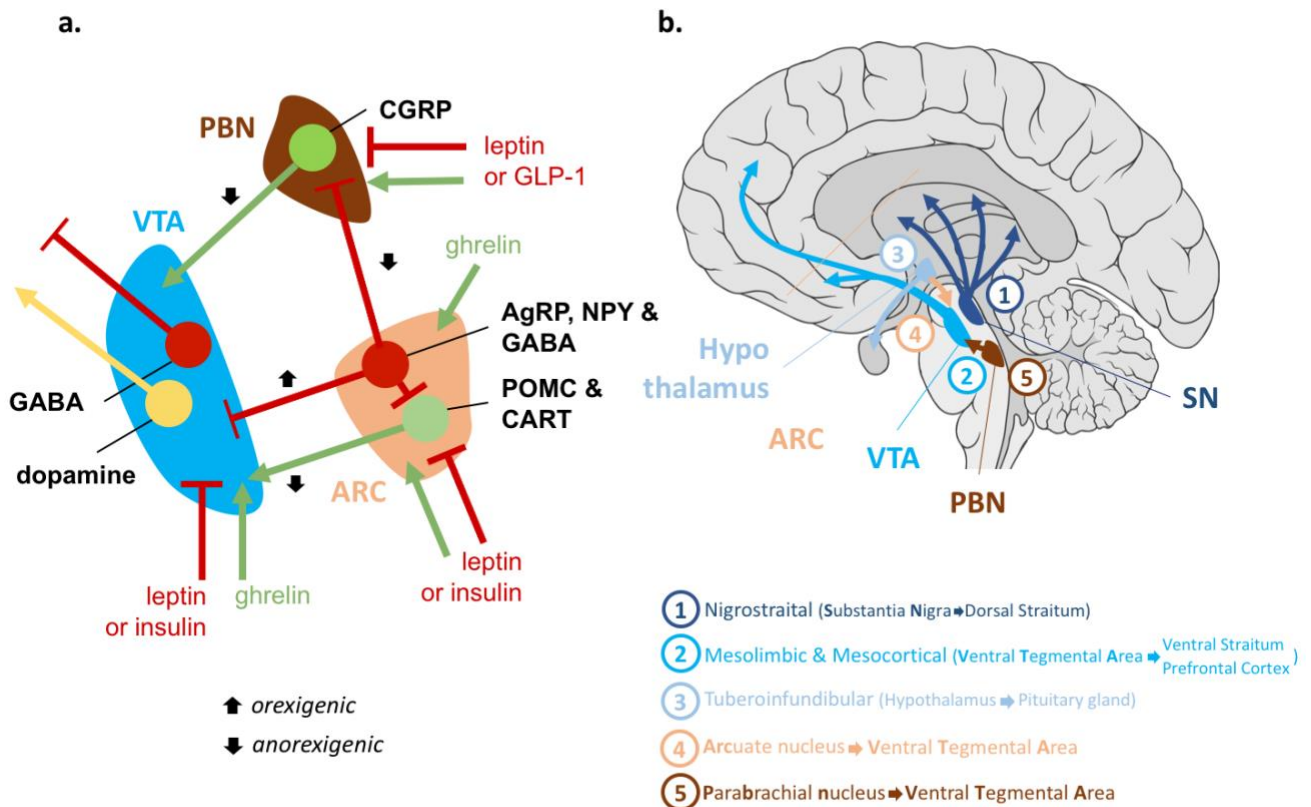

776

777 **Figure 6 | Homeostatic-reinforcement interface.** a, Red T-lines and lettering illustrate inhibitory inputs; Green  
778 arrows and text indicate excitatory inputs. Dopamine is coloured yellow as this can have both excitatory and  
779 inhibitory effects depending on receptor subtypes. Projections: Cocaine and amphetamine regulated transcript  
780 (CART) and pro-opiomelanocortin (POMC) in the ARC of the hypothalamus process POMC to alpha-MSH that  
781 activate melanocortin-4 receptors (MC4R) on post-synaptic cells in the arcuate of the lateral hypothalamus  
782 (ARC), which projects to the VTA (details not shown here, see Ferrario et al. 2016). This melanocortin pathway  
783 is suppressed by neighbouring cells in the ARC that produce Agouti-related protein (AgRP), neuropeptide Y  
784 (NPY) and GABA that all inhibit POMC neurons (Mandelblat-Cerf et al. 2015) and project to many of the same  
785 sites, including the VTA. Further, these project to CGRP neurons in the parabrachial nuclei, which in turn  
786 projects to VTA. Hormone input: AgRP neurons are inhibited (red T-bar) by leptin and insulin, whereas POMC  
787 are activated by those same hormones (green arrow). Hormone ghrelin, that signal short term energy deficits,  
788 activates AgRP and dopamine (green arrows) in the VTA (Palmiter 2007). Conversely, leptin and insulin  
789 attenuates dopaminergic firing (red T-bar). b., There are four important dopaminergic pathways that project  
790 from the midbrain widely through the brain. Importantly, the VTA projects through the mesolimbic &  
791 mesocortical reward circuit to the caudate & nucleus accumbens (NAc) in the striatum and also the amygdala,  
792 hippocampus and prefrontal cortex. Further, the VTA also hosts GABAergic projection neurons that modulate  
793 many of the same target regions as dopamine.

794

## 795 **Acknowledgements**

796 We thank Mehdi Keramati and Boris Gutkin for several helpful discussions. This work  
797 was supported by the following funders: H.R.S (Lundbeck Foundation Grant of Excellence  
798 “ContAct” ref: R59 A5399 ; Novo Nordisk Foundation Interdisciplinary Synergy Programme  
799 Grant “BASICS” ref: NNF14OC0011413) O.J.H (Lundbeck Foundation, ref: R140-2013-13057;  
800 Danish Research Council ref: 12-126925) T.M. (Lundbeck Foundation ref: R140-2013-13057),  
801 K.F (The Wellcome Trust ref: 088130/Z/09/Z), D.B (The Francis Crick Institute, which receives  
802 its core funding from Cancer Research UK, the UK Medical Research Council, and the  
803 Wellcome Trust).

## 804 **Author contributions**

805 O.J.H and T.M conceived of the paper and made the figures. All authors contributed to  
806 the writing and editing of the paper.

## 807 **Author Information**

808 The authors declare no competing financial interests.

## 809 **References**

- 810 Aponte, Y., Atasoy, D. & Sternson, S.M., 2011. AGRP neurons are sufficient to orchestrate  
811 feeding behavior rapidly and without training. *Nature Neuroscience*, 14(3), pp.351–355.
- 812 Atasoy, D. et al., 2012. Deconstruction of a neural circuit for hunger. *Nature*, 488(7410),  
813 pp.172–177.
- 814 Ballard, K. & Knutson, B., 2009. Dissociable neural representations of future reward  
815 magnitude and delay during temporal discounting. *NeuroImage*, 45(1), pp.143–150.
- 816 Berridge, K.C., 2004. Motivation concepts in behavioral neuroscience. *Physiology &*  
817 *Behavior*, 81(2), pp.179–209.
- 818 Berridge, K.C. & Robinson, T.E., 2003. Parsing reward. *Trends in Neurosciences*, 26(9),  
819 pp.507–513.
- 820 Betley, J.N. et al., 2015. Neurons for hunger and thirst transmit a negative-valence teaching  
821 signal. *Nature*, 521(7551), pp.180–185.

- 822 Bogacz, R., 2015. A tutorial on the free-energy framework for modelling perception and  
823 learning. *Journal of Mathematical Psychology*.
- 824 Carlson, J.N. et al., 1987. Selective enhancement of dopamine utilization in the rat  
825 prefrontal cortex by food deprivation. *Brain Research*, 400(1), pp.200–203.
- 826 Carpenter, R.H.S., 2004. Homeostasis: a plea for a unified approach. *AJP: Advances in*  
827 *Physiology Education*, 28(1-4), pp.180–187.
- 828 Chen, Y. & Knight, Z.A., 2015. Making sense of the sensory regulation of hunger neurons.  
829 *BioEssays : news and reviews in molecular, cellular and developmental biology*, 38(4),  
830 pp.316–324.
- 831 Chen, Y. et al., 2016. Hunger neurons drive feeding through a sustained, positive  
832 reinforcement signal. *eLife*, 5, p.e18640.
- 833 Cone, J.J. et al., 2016. Physiological state gates acquisition and expression of mesolimbic  
834 reward prediction signals. *Proceedings of the National Academy of Sciences of the*  
835 *United States of America*, 113(7), pp.1943–1948.
- 836 Dietrich, M.O. et al., 2012. AgRP neurons regulate development of dopamine neuronal  
837 plasticity and nonfood-associated behaviors. *Nature Neuroscience*, 15(8), pp.1108–  
838 1110.
- 839 Domingos, A.I. et al., 2011. Leptin regulates the reward value of nutrient. *Nature*  
840 *Neuroscience*, 14(12), pp.1562–1568.
- 841 Dranias, M.R., Grossberg, S. & Bullock, D., 2008. Dopaminergic and non-dopaminergic value  
842 systems in conditioning and outcome-specific revaluation. *Brain Research*, 1238,  
843 pp.239–287.
- 844 Feldman, A.G., 1986. Once more on the equilibrium-point hypothesis (lambda model) for  
845 motor control. *Journal of motor behavior*, 18(1), pp.17–54.
- 846 Ferrario, C.R. et al., 2016. Homeostasis Meets Motivation in the Battle to Control Food  
847 Intake. *Journal of Neuroscience*, 36(45), pp.11469–11481.
- 848 Friston, K., 2012. A Free Energy Principle for Biological Systems. *Entropy*, 14(11), pp.2100–  
849 2121.
- 850 Friston, K. & Ao, P., 2012. Free Energy, Value, and Attractors. *Computational and*  
851 *Mathematical Methods in Medicine*, 2012(5), pp.1–27.
- 852 Friston, K. et al., 2017. Deep temporal models and active inference. *Neuroscience &*  
853 *Biobehavioral Reviews*.
- 854 Friston, K., Kilner, J. & Harrison, L., 2006. A free energy principle for the brain. *Journal of*  
855 *Physiology-Paris*, 100(1-3), pp.70–87.
- 856 Frith, C., 2012. Explaining delusions of control: The comparator model 20years on.



- 857        *Consciousness and cognition*.
- 858    Fulton, S., 2000. Modulation of Brain Reward Circuitry by Leptin. 287(5450), pp.125–128.  
859        Available at: <http://www.sciencemag.org/cgi/doi/10.1126/science.287.5450.125>.
- 860    Ghahramani, Z., 2012. Bayesian non-parametrics and the probabilistic approach to  
861        modelling. *Philosophical Transactions of the Royal Society A: Mathematical, Physical and*  
862        *Engineering Sciences*, 371(1984), pp.20110553–20110553.
- 863    Glimcher, P.W., 2010. *Foundations of Neuroeconomic Analysis*, Oxford University Press.
- 864    Heffner, T.G., Hartman, J.A. & Seiden, L.S., 1980. Feeding increases dopamine metabolism in  
865        the rat brain. *Science (New York, N.Y.)*, 208(4448), pp.1168–1170.
- 866    Hull, C.L., 1943. *Principles of Behavior: An Introduction to Behavior Theory*, D. Appleton-  
867        Century Company, Incorporated.
- 868    Keramati, M. & Gutkin, B., 2014. Homeostatic reinforcement learning for integrating reward  
869        collection and physiological stability. *eLife*, 3, p.475.
- 870    King, C.M. & Hentges, S.T., 2011. Relative number and distribution of murine hypothalamic  
871        proopiomelanocortin neurons innervating distinct target sites. *PLoS ONE*, 6(10),  
872        p.e25864.
- 873    Krashes, M.J. et al., 2014. An excitatory paraventricular nucleus to AgRP neuron circuit that  
874        drives hunger. Available at:  
875        <http://www.nature.com/nature/journal/v507/n7491/abs/nature12956.html>.
- 876    Luquet, S. et al., 2005. NPY/AgRP neurons are essential for feeding in adult mice but can be  
877        ablated in neonates. *Science (New York, N.Y.)*, 310(5748), pp.683–685.
- 878    Mandelblat-Cerf, Y. et al., 2015. Arcuate hypothalamic AgRP and putative POMC neurons  
879        show opposite changes in spiking across multiple timescales. *eLife*, 4, p.351. Available  
880        at: <http://elifesciences.org/lookup/doi/10.7554/eLife.07122>.
- 881    McCullough, L.D. & Salamone, J.D., 1992. Involvement of nucleus accumbens dopamine in  
882        the motor activity induced by periodic food presentation: a microdialysis and behavioral  
883        study. *Brain Research*, 592(1-2), pp.29–36.
- 884    Miall, R.C. & Wolpert, D.M., 1996. Forward Models for Physiological Motor Control. 9(8),  
885        pp.1265–1279. Available at:  
886        <http://www.sciencedirect.com/science/article/pii/S0893608096000354>.
- 887    Niv, Y., Duff, M.O. & Dayan, P., 2005. Behavioral and Brain Functions. *Behavioral and Brain*  
888        *Functions*, 1(1), pp.6–9.
- 889    Palmiter, R.D., 2007. Is dopamine a physiologically relevant mediator of feeding behavior?  
890        *Trends in Neurosciences*, 30(8), pp.375–381. Available at:  
891        <http://linkinghub.elsevier.com/retrieve/pii/S0166223607001336>.

- 892 Pandit, R. et al., 2015. Central Melanocortins Regulate the Motivation for Sucrose Reward J.  
893 E. McCutcheon, ed. *PLoS ONE*, 10(3).
- 894 Pezzulo, G., Rigoli, F. & Friston, K., 2015. Active Inference, homeostatic regulation and  
895 adaptive behavioural control. *Progress in Neurobiology*, 134, pp.1–19.
- 896 Powers, W.T., 2016. *Perceptual Control Theory*, Living Control Systems Publ.
- 897 Radhakishun, F.S., van Ree, J.M. & Westerink, B.H., 1988. Scheduled eating increases  
898 dopamine release in the nucleus accumbens of food-deprived rats as assessed with on-  
899 line brain dialysis. *Neuroscience letters*, 85(3), pp.351–356.
- 900 Schultz, W., Dayan, P. & Montague, P.R., 1997. A neural substrate of prediction and reward.  
901 *Science (New York, N.Y.)*, 275(5306), pp.1593–1599.
- 902 Seth, A.K., 2013. Interoceptive inference, emotion, and the embodied self. *Trends in*  
903 *Cognitive Sciences*, 17(11), pp.1–9.
- 904 Small, D.M., Jones-Gotman, M. & Dagher, A., 2003. Feeding-induced dopamine release in  
905 dorsal striatum correlates with meal pleasantness ratings in healthy human volunteers.  
906 *NeuroImage*, 19(4), pp.1709–1715.
- 907 Stauffer, W.R., Lak, A. & Schultz, W., 2014. Dopamine Reward Prediction Error Responses  
908 Reflect Marginal Utility. *Current Biology*, 24(21), pp.2491–2500.
- 909 Stephan, K.E. et al., 2016. Allostatic Self-efficacy: A Metacognitive Theory of  
910 Dyshomeostasis-Induced Fatigue and Depression. *Frontiers in human neuroscience*, 10,  
911 p.49.
- 912 Sterling, P., 2012. Allostasis: A model of predictive regulation. *Physiology & Behavior*, 106(1),  
913 pp.5–15.
- 914 Takahashi, K.A. & Cone, R.D., 2005. Fasting induces a large, leptin-dependent increase in the  
915 intrinsic action potential frequency of orexigenic arcuate nucleus neuropeptide  
916 Y/Agouti-related protein neurons. *Endocrinology*, 146(3), pp.1043–1047.
- 917 Thorndike, E.L., 1927. The law of effect. *American Journal of Psychology*, 39, pp.212–222.
- 918 Tobler, P.N., Fiorillo, C.D. & Schultz, W., 2005. Adaptive coding of reward value by dopamine  
919 neurons. *Science (New York, N.Y.)*, 307(5715), pp.1642–1645.
- 920 Woods, S.C. & Ramsay, D.S., 2007. *Homeostasis: beyond Curt Richter*,
- 921 Yen, H.-H. & Roseberry, A.G., 2015. Decreased consumption of rewarding sucrose solutions  
922 after injection of melanocortins into the ventral tegmental area of rats.  
923 *Psychopharmacology*, 232(1), pp.285–294.

924

925

926 Fiorillo, C. D., P. N. Tobler and W. Schultz (2003). "Discrete coding of reward probability  
927 and uncertainty by dopamine neurons." Science **299**(5614): 1898-1902.  
928 Friston, K., P. Schwartenbeck, T. FitzGerald, M. Moutoussis, T. Behrens and R. J. Dolan  
929 (2014). "The anatomy of choice: dopamine and decision-making." Philos Trans R Soc Lond  
930 B Biol Sci **369**(1655).  
931 Humphries, M. D., M. Khamassi and K. Gurney (2012). "Dopaminergic Control of the  
932 Exploration-Exploitation Trade-Off via the Basal Ganglia." Front Neurosci **6**: 9.  
933 Niv, Y., M. O. Duff and P. Dayan (2005). "Dopamine, uncertainty and TD learning." Behav  
934 Brain Funct. **1**: 6.  
935 Schwartenbeck, P., T. H. FitzGerald, C. Mathys, R. Dolan and K. Friston (2015). "The  
936 Dopaminergic Midbrain Encodes the Expected Certainty about Desired Outcomes." Cereb  
937 Cortex **25**(10): 3434-3445.  
938 Seth, A. (2014). The cybernetic brain: from interoceptive inference to sensorimotor  
939 contingencies. MINDS project. Metzinger, T; Windt, JM, MINDS.  
940
